# Supplementary material for: A cfDNA methylation-based tissue-of-origin classifier for cancers of unknown primary
Source: PubMed Central journal article supplement (PMC11024142; doi:10.1038/s41467-024-47195-7), 2024-04-17
Supplement: 41467_2024_47195_MOESM4_ESM.pdf [file 41467_2024_47195_MOESM4_ESM.pdf]

## Description of Additional Supplementary Data Files

### **Supplementary Data 1**

**Description:** Methylation array samples used for classifier generation or reasons for exclusion

### **Supplementary Data 2**

**Description:** Clinical characteristics and T7-MBD-Seq metrics of 79 NCC cfDNA samples used for building the classifiers. Sequencing details for the enriched fraction (blue) and non-enriched fraction (green).

### **Supplementary Data 3**

**Description:** Clinical characteristics and T7-MBD-Seq metrics of cfDNA from 143 patients and 27 NCCs. Sequencing details for the enriched fractions (blue) and non-enriched fractions (green).

### **Supplementary Data 4**

**Description:** CUPiD predictions for the independent test cohort, mean values across the 100 sub-classifiers.

### **Supplementary Data 5**

**Description:** Clinical and pathological characteristics of CUP cohort, tumour type enriched alterations (TTAEs) and CUPiD Predictions.

### **Supplementary Data 6**

**Description:** Sequencing statistics for cfDNA and gDNA targeted mutation sequencing for the CUP cohort.

### **Supplementary Data 7**

**Description:** List of relevant mutations found from cfDNA in the 40 patients with CUP with successful mutation profiling (\*indicates nomenclature for Stop codon).

### **Supplementary Data 8**

**Description:** Clinical characteristics and T7-MBD-Seq metrics from cfDNA samples of 41 patients with CUP. Sequencing details for the enriched fractions (blue) and non-enriched fractions (green).

### **Supplementary Data 9**

**Description:** CUPiD Predictions in the CUP cohort
